# Supplementary material for: A simplified instrumental protocol for trace Nd and Hf isotope measurements (<10 ng) using a MC-ICP-MS and an Apex Omega de-solvating system
Source: Royal Society of Chemistry journal article supplement (doi:10.1039/d4ja00276h), 2024-01-01
Supplement: d4ja00276h1.pdf [file d4ja00276h1.pdf]

### column chemistry

The three-step ion exchange chromatography was described in table 1. The first separation is done on a column (I.D.~5.5 mm) filled with Ln-spec resin (~4.5 cm). The Ln column was first conditioned with 10 mL 3 M HCl, followed by addition of 1 mL sample solution. The Rb, Sr and LREE fraction was eluted with 12 mL 3 M HCl. After that, 10 mL 6 M HCl was added to elute Lu. The column was then washed with 10 mL 6 M HCl and 1 mL de-ionized water. This was followed by addition of 30 mL 0.3 M HNO<sub>3</sub> (mixed with 0.09 M citric acid and 1% H<sub>2</sub>O<sub>2</sub>) to wash Ti. After addition of 3 mL 0.3 M HNO<sub>3</sub> (mixed with 0.09 M citric acid), Zr was washed with 20 mL 6 M HCl. Finally Hf was eluted with 12 mL 2 M HF. Then the Ln column was cleaned with 4 mL 2 M HF and 4 mL 6 M HCl/2 M HF. The second separation is done on a column (I.D.~5 mm) filled with AG50W-X8 cation-exchange resin (~7 cm), the Rb, Sr and LREE fraction was evaporated and dissolved with 1 mL 2 M HCl. This column was first conditioned with 10 mL 2 M HCl. Then sample solution was loaded onto the column. After addition of 3 mL 2.2 M HCl, the Rb and Sr cuts were eluted with 4 mL and 8 mL 2.2 M HCl respectively. The LREE cut was then collected with 12 mL 6 M HCl. The third separation is done on the same column used in the first separation. The LREE cut was evaporated and dissolved with 1 mL 0.18 M HCl. The Ln column was first conditioned with 10 mL 0.18 M HCl and then loaded with 1 mL LREE solution. Successively, 3 mL 0.18 M HCl and 1.5 mL 0.25 M HCl were added to wash matrix. Nd was then eluted with 6 mL 0.25 M HCl. The Nd and Hf cuts were evaporated and re-dissolved with 2% HNO<sub>3</sub> for isotopic measurements.

**Table 1** Chemical purification procedures for Nd and Hf isotope

| step                      | volume   | acid                                                                      |
|---------------------------|----------|---------------------------------------------------------------------------|
| <i>Column 1(Ln spec.)</i> |          |                                                                           |
| conditioning              | 10 ml    | 3 M HCl                                                                   |
| load                      | 1 ml     | 2 M HCl/ ca 0.1 M asc.ac                                                  |
| Rb-Sr-LREE                | 12 ml    | 3 M HCl                                                                   |
| Lu                        | 10 ml    | 6 M HCl                                                                   |
| wash                      | 10 ml    | 6 M HCl                                                                   |
|                           | 1 ml     | H <sub>2</sub> O or 0.3 M HCl                                             |
| wash-Ti                   | 30-50 ml | 0.3 M HNO <sub>3</sub> /0.09 M citr.acid/1% H <sub>2</sub> O <sub>2</sub> |
|                           | ca 3 ml  | 0.3 M HNO <sub>3</sub> /0.09 M citr.acid                                  |
| wash-Zr                   | 20 ml    | 6 M HCl                                                                   |
| Hf                        | 12 ml    | 2 M HF                                                                    |

|                                          |        |                  |
|------------------------------------------|--------|------------------|
| clean                                    | 4 ml   | 2 M HF           |
|                                          | 4 ml   | 6 M HCl / 2M HF  |
| <i>Column 2 (AG50W-X8 resin.)</i>        |        |                  |
| conditioning                             | 10 ml  | 2 M HCl          |
| load                                     | 1 ml   | 2 M HCl          |
|                                          | 0.3 ml |                  |
| wash                                     | 0.3 ml |                  |
|                                          | 0.3 ml | 2.2 M HCl        |
|                                          | 2 ml   |                  |
| Rb                                       | 4 ml   | 2.2 M HCl        |
| Sr                                       | 8 ml   | 2.2 M HCl        |
| LREE                                     | 12 ml  | 6 M HCl          |
| clean                                    | 5 ml   | 6 M HCl          |
|                                          | 4 ml   | 2 M HF / 6 M HCl |
| <i>Column 3 (Ln spec as in column 1)</i> |        |                  |
| conditioning                             | ~10 ml | 0.18 M HCl       |
| load                                     | 1 ml   | 0.18 M HCl       |
| wash                                     | 3 ml   | 0.18 M HCl       |
| wash                                     | 1.5 ml | 0.25 M HCl       |
| Nd                                       | 6-7 ml | 0.25 M HCl       |
| Sm                                       | 3.5 ml | 0.75 M HCl       |
| clean                                    | 1 ml   | 6 M HCl          |
|                                          | 3 ml   | 6 M HCl          |
|                                          | 4 ml   | 2 M HF / 6 M HCl |

---
