# Supplementary material for: A simplified instrumental protocol for trace Nd and Hf isotope measurements (<10 ng) using a MC-ICP-MS and an Apex Omega de-solvating system
Source: Royal Society of Chemistry journal article supplement (doi:10.1039/d4ja00276h), 2024-01-01
Supplement: d4ja00276h2.xlsx [file d4ja00276h2.xlsx]

## Sheet: figure_1
	Ar(ml/min)	145NdO	145Nd	143Nd/144Nd	2SE	NdO
	3.7	6.13914e-05	0.319337	0.512465	1.65181e-05	0.000192247
	3.75	0.000124612	0.376582	0.512411	1.53112e-05	0.000330903
	3.8	0.000106876	0.438338	0.512334	1.48377e-05	0.000243821
	3.85	9.11676e-05	0.496048	0.512259	1.69171e-05	0.000183788
	3.9	0.000143152	0.561705	0.512202	2.18057e-05	0.000254852
	3.95	0.00012175	0.621149	0.51219	1.64616e-05	0.000196007
	4	0.000178028	0.662588	0.51219	1.77684e-05	0.000268686
	4.05	0.000121095	0.717914	0.51219	1.85075e-05	0.000168677
	4.1	0.000180263	0.753064	0.512195	1.61414e-05	0.000239373
	4.15	0.000265402	0.784446	0.512177	1.10325e-05	0.000338331
	4.2	0.000294469	0.801909	0.512176	1.45855e-05	0.00036721
	4.25	0.000354543	0.817653	0.512187	1.49284e-05	0.00043361
	4.3	0.000443424	0.831304	0.512197	1.82805e-05	0.000533408
	4.4	0.000852853	0.872115	0.512167	1.316e-05	0.000977913
	4.5	0.00207017	0.939942	0.512142	1.65713e-05	0.00220245
	4.6	0.00523726	1.04971	0.512089	1.57796e-05	0.00498926
	4.7	0.0122912	1.14581	0.51202	1.66649e-05	0.0107271
	4.8	0.0271614	1.17389	0.511917	2.13043e-05	0.0231378
	N2(ml/min)	145NdO	145Nd	143Nd/144Nd	2SE	NdO
	6.6	2.86951e-05	0.393522	0.512342	1.5e-05	7.29186e-05
	6.7	0.000106488	0.424607	0.512323	1.3e-05	0.000250793
	6.8	6.4223e-05	0.443308	0.512274	1.9e-05	0.000144872
	6.9	6.72183e-05	0.46792	0.512256	1.7e-05	0.000143654
	6.95	0.000101839	0.477171	0.512262	1.7e-05	0.000213423
	7	7.4223e-05	0.490785	0.512222	1.6e-05	0.000151233
	7.05	8.63391e-05	0.501131	0.512217	1.5e-05	0.000172288
	7.1	8.76355e-05	0.510892	0.512204	1.3e-05	0.000171534
	7.15	0.00013254	0.514899	0.512197	1.4e-05	0.00025741
	7.2	8.75313e-05	0.531488	0.512214	1.3e-05	0.000164691
	7.3	9.88577e-05	0.55234	0.512195	1.4e-05	0.00017898
	7.4	0.000110423	0.56921	0.512201	1.5e-05	0.000193993
	7.5	0.000150678	0.583343	0.512193	1.6e-05	0.000258301
	7.6	6.99903e-05	0.59715	0.512206	1.2e-05	0.000117207
	7.7	0.000106876	0.611629	0.512193	1.5e-05	0.000174739
	7.9	7.76803e-05	0.624934	0.51221	1.6e-05	0.000124302
	8.1	0.000132078	0.630301	0.512169	1.5e-05	0.000209547
	8.3	0.000114953	0.627055	0.512161	1.7e-05	0.000183323
	sample gas(ml/min)	145NdO	145Nd	143Nd/144Nd	2SE	NdO
	0.87	9.54151e-05	0.466292	0.512308	1.7e-05	0.000204625
	0.88	8.59216e-05	0.473903	0.512292	1.6e-05	0.000181306
	0.89	9.28964e-05	0.47968	0.512258	1.4e-05	0.000193663
	0.9	9.37014e-05	0.493424	0.512256	1.8e-05	0.0001899
	0.91	6.83662e-05	0.508321	0.51223	2e-05	0.000134494
	0.92	0.000111332	0.520603	0.512219	1.7e-05	0.000213852
	0.93	0.000105669	0.53087	0.512203	1.8e-05	0.000199048

## Sheet: figure_2
	Ar(ml/min)	180Hf	176Hf/177Hf	2SE
	4	1.77089	0.28246	1.35119e-05
	4.05	1.89035	0.282272	1.65181e-05
	4.1	2.06639	0.28226	1.62381e-05
	4.15	2.12879	0.2822	1.53112e-05
	4.2	2.11326	0.282163	1.48377e-05
	4.25	2.12321	0.282156	1.69171e-05
	4.3	2.14481	0.282164	2.18057e-05
	4.35	2.14122	0.282163	1.64616e-05
	4.4	2.13748	0.282137	1.77684e-05
	4.45	2.18988	0.282141	1.85075e-05
	4.5	2.25851	0.282158	1.61414e-05
	4.55	2.39737	0.282166	1.10325e-05
	4.6	2.26703	0.282157	1.45855e-05
	4.65	2.25968	0.282177	1.49284e-05
	4.7	2.33135	0.28217	1.82805e-05
	4.75	2.2737	0.282174	1.316e-05
	4.8	2.13212	0.282175	1.65713e-05
	4.85	2.00979	0.282185	1.57796e-05
	4.9	1.8181	0.282185	1.66649e-05
	4.95	1.63408	0.282184	2.13043e-05
	5	1.45395	0.282182	2.29549e-05
	N2(ml/min)	180Hf	176Hf/177Hf	2SE
	3.2	1.71847	0.282174	1.48901e-05
	3.8	2.26069	0.282158	1.67663e-05
	4.4	2.306	0.282145	1.15187e-05
	5	2.24902	0.282157	1.33989e-05
	5.6	2.25057	0.282151	1.58697e-05
	6.2	2.3698	0.282166	1.13134e-05
	6.8	2.48895	0.282159	1.51636e-05
	7.4	2.27273	0.282171	1.70317e-05
	sample gas(ml/min)	180Hf	176Hf/177Hf	2SE
	0.9	2.01646	0.282162	1.75094e-05
	0.91	2.00842	0.282157	1.72558e-05
	0.92	2.05499	0.282154	1.62346e-05
	0.94	2.04662	0.28216	1.75356e-05
	0.96	2.04985	0.282166	1.85877e-05
	0.98	2.0253	0.282145	1.56551e-05
	1	2.01125	0.282166	1.3487e-05
	1.02	1.98134	0.282171	1.82389e-05
	1.04	1.91692	0.282161	1.85439e-05
	1.06	1.89003	0.282167	1.97483e-05
	1.08	1.85063	0.282173	1.31717e-05
	1.1	1.77854	0.282165	1.60299e-05
	1.12	1.74141	0.282165	1.38919e-05

## Sheet: figure_3
	JMC-Nd		143Nd/144Nd	2SE
	2ppb	1	0.512219	2.75069e-05
		2	0.512255	2.31884e-05
		3	0.512224	2.61062e-05
		4	0.512233	2.82673e-05
		5	0.512241	2.9235e-05
	4ppb	6	0.512224	2.27988e-05
		7	0.512216	2.30142e-05
		8	0.512208	2.35529e-05
		9	0.512231	2.32452e-05
		10	0.512233	2.33154e-05
	6ppb	11	0.512229	1.64378e-05
		12	0.512208	1.98778e-05
		13	0.512226	2.29118e-05
		14	0.512237	2.15021e-05
		15	0.512227	2.27915e-05
	8ppb	16	0.512229	1.69914e-05
		17	0.512238	1.4647e-05
		18	0.512227	1.46944e-05
		19	0.512234	1.38693e-05
		20	0.512248	1.31145e-05
	10ppb	21	0.512236	8.82583e-06
		22	0.512226	9.05126e-06
		23	0.512232	7.42849e-06
		24	0.512224	8.60268e-06
		25	0.512225	1.01843e-05
2ppb JMC-Nd		143Nd/144Nd	2SE
	1	0.512249	2.58038e-05
	2	0.512215	2.74708e-05
	3	0.512175	3.03348e-05
	4	0.512222	2.93466e-05
	5	0.512199	2.71525e-05
	6	0.512219	2.94709e-05
	7	0.512242	2.90222e-05
	8	0.512168	2.94746e-05
	9	0.512214	2.79783e-05
	10	0.512206	2.73119e-05
	11	0.512205	2.82659e-05
	12	0.512231	2.82196e-05
	13	0.512214	2.89796e-05
	14	0.512267	2.87946e-05
	15	0.512258	2.58357e-05
	16	0.512249	2.26094e-05
	17	0.512212	2.58713e-05
	18	0.512192	2.72001e-05
	19	0.5122	2.54854e-05
	20	0.512208	2.64549e-05
	21	0.512205	2.87277e-05
	22	0.512221	2.38033e-05
	23	0.512176	2.85333e-05
	24	0.512181	2.72407e-05
	25	0.512277	2.58974e-05
	26	0.512223	2.67027e-05
	27	0.512246	2.17322e-05
	28	0.512197	2.78307e-05
	29	0.512211	2.6272e-05
	30	0.512197	2.62618e-05
	31	0.512184	2.59943e-05
	32	0.512213	2.72503e-05
	33	0.512258	2.5264e-05
	34	0.512247	2.73045e-05
	35	0.512267	2.54054e-05
	36	0.512276	2.77628e-05
	37	0.512283	2.82352e-05
	38	0.512287	2.85615e-05
	39	0.512226	2.60214e-05
	40	0.512249	2.55556e-05
	41	0.512197	2.75404e-05
	42	0.512256	2.77388e-05
2ppb Jndi-1		143Nd/144Nd	2SE
	1	0.51211	2.74565e-05
	2	0.512115	2.89991e-05
	3	0.512137	2.86785e-05
	4	0.512145	2.86675e-05
	5	0.512099	2.8929e-05
	6	0.512084	2.60964e-05
	7	0.512088	2.62851e-05
	8	0.512128	2.57586e-05
	9	0.512093	2.64979e-05
	10	0.512103	2.59848e-05
	11	0.512126	2.88514e-05
	12	0.512103	2.21258e-05
	13	0.512127	2.91751e-05
	14	0.512105	2.26099e-05
	15	0.512122	2.16113e-05
	16	0.512141	2.39977e-05
	17	0.512127	2.39404e-05
	18	0.512117	2.64665e-05
	19	0.512142	2.64559e-05
	20	0.512138	2.60829e-05
	21	0.512143	2.556e-05
	22	0.51211	2.77762e-05
	23	0.512106	2.13057e-05
	24	0.512106	2.75939e-05

## Sheet: figure_4
	JMC 475 Hf		176Hf/177Hf	2SE
	2ppb	1	0.282147	2.73724e-05
		2	0.282145	2.79825e-05
		3	0.282144	2.56295e-05
		4	0.282167	2.81918e-05
		5	0.282142	2.82824e-05
	4ppb	6	0.282176	1.9925e-05
		7	0.282173	1.88187e-05
		8	0.282169	1.71763e-05
		9	0.282163	1.52682e-05
		10	0.282154	1.87828e-05
	6ppb	11	0.282162	1.31763e-05
		12	0.282165	1.44135e-05
		13	0.282155	1.28275e-05
		14	0.282164	1.50709e-05
		15	0.28215	1.32537e-05
	8ppb	16	0.282144	1.15064e-05
		17	0.282159	1.02682e-05
		18	0.28215	1.05783e-05
		19	0.282142	1.16573e-05
		20	0.28217	9.68319e-06
	10ppb	21	0.282166	9.66753e-06
		22	0.282158	9.71405e-06
		23	0.282147	9.28869e-06
		24	0.282151	9.97176e-06
		25	0.282156	8.92092e-06
2ppb JMC 475 Hf			176Hf/177Hf	2SE
		1	0.282147	2.73724e-05
		2	0.282145	2.79825e-05
		3	0.282144	2.56295e-05
		4	0.282167	2.81918e-05
		5	0.282142	2.82824e-05
		6	0.282172	2.83724e-05
		7	0.282167	3.04892e-05
		8	0.282182	2.78536e-05
		9	0.28215	2.82433e-05
		10	0.282165	3.06247e-05
		11	0.282171	3.05673e-05
		12	0.282171	2.82326e-05
		13	0.282177	3.10021e-05
		14	0.282182	2.92561e-05
		15	0.282173	3.02102e-05
		16	0.28217	2.81124e-05
		17	0.282171	3.00533e-05
		18	0.282142	2.87685e-05
		19	0.282166	2.93324e-05
		20	0.28215	2.88723e-05
		21	0.28216	3.12249e-05

## Sheet: figure_5
	Ce/Nd	143Nd/144Nd	2SE
	0.1	0.512222	1.25145e-05
	0.2	0.512219	1.35977e-05
	0.3	0.512214	1.38713e-05
	0.4	0.512199	1.22667e-05
	0.5	0.512211	1.09514e-05
	0.6	0.512208	1.15705e-05
	0.7	0.512218	1.26339e-05
	0.8	0.512212	1.42412e-05
	0.9	0.5122	1.70907e-05
	1	0.512221	1.89e-05
	Sm/Nd	143Nd/144Nd	2SE
	0.002	0.512219	1.43646e-05
	0.004	0.512212	6.81056e-06
	0.006	0.512222	1.08705e-05
	0.008	0.51221	8.63686e-06
	0.01	0.512216	1.22226e-05
	0.012	0.512223	1.2819e-05
	0.014	0.512224	7.26035e-06
	0.016	0.512202	1.27162e-05
	0.018	0.512207	1.01218e-05
	0.02	0.512223	1.00447e-05
	0.04	0.512206	1.25639e-05
	0.06	0.512212	8.8022e-06
	0.08	0.512223	9.23658e-06
	0.1	0.512221	9.15947e-06

## Sheet: figure_6
	Yb/Hf	176Hf/177Hf	2SE
	0.002	0.282152	9.53368e-06
	0.004	0.282157	7.37251e-06
	0.006	0.28216	9.01294e-06
	0.008	0.282145	1.07194e-05
	0.01	0.282148	9.5342e-06
	0.012	0.282145	9.89928e-06
	0.014	0.282146	8.92183e-06
	0.016	0.282152	1.07019e-05
	0.018	0.28215	1.05014e-05
	0.02	0.282155	1.16277e-05
	0.04	0.282137	1.27771e-05
	0.06	0.282117	8.21628e-06
	0.08	0.282096	1.22442e-05
	0.1	0.282073	1.11936e-05
	Lu/Hf	176Hf/177Hf	2SE
	0.002	0.282164	1.23874e-05
	0.004	0.282161	1.61507e-05
	0.006	0.28217	1.31812e-05
	0.008	0.282177	1.41841e-05
	0.01	0.282145	1.78616e-05
	0.012	0.282182	1.47225e-05
	0.014	0.28222	1.84089e-05
	0.016	0.282382	2.23087e-05
	0.018	0.282648	2.37768e-05
	0.02	0.282812	1.44244e-05
